# Supplementary material for: Effects of Long Term Antibiotic Therapy on Human Oral and Fecal Viromes
Source: PLOS journal article supplement (doi:10.1371/journal.pone.0134941), 2015-08-26

**S1 Fig.:** Bar graph of the percentage of contigs with viral homologues in the NR database from the feces (Panel A) and the saliva (Panel B) of all subjects. The percentage of contigs with viral homologues is shown on the y-axis and the subjects and relevant time points are shown on the x-axis. Time A represents day #3, time B represents week #2, and time C represents week #6.

## A. feces

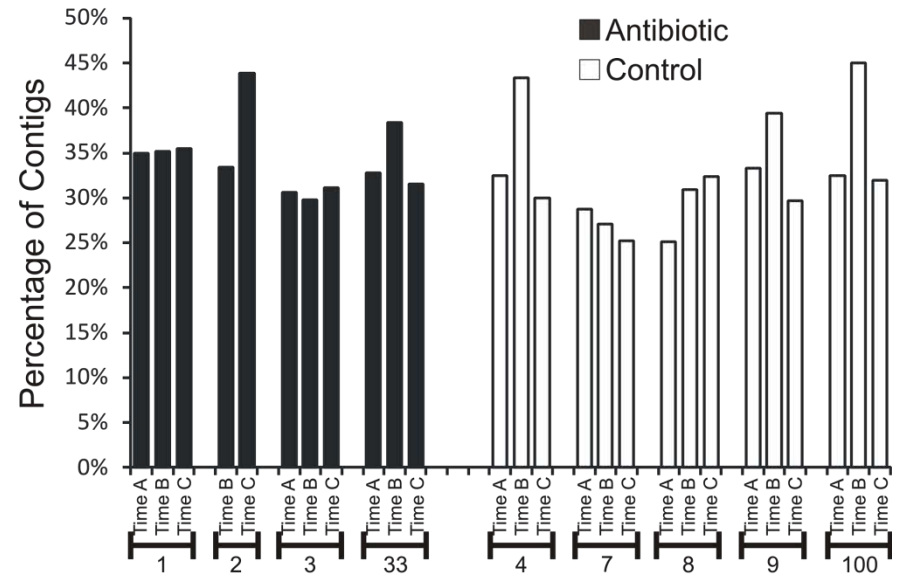

## B. saliva

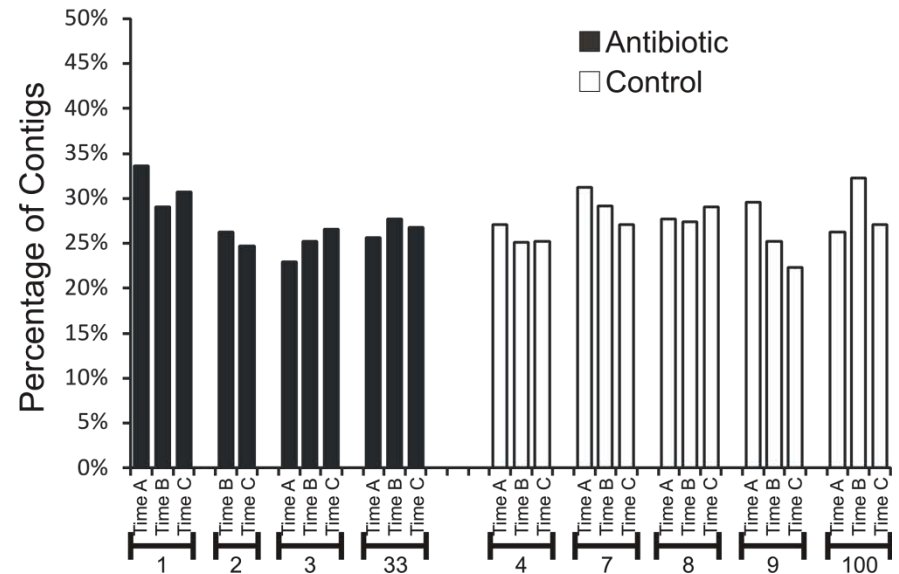

Supplement: S1 (10.1371/journal.pone.0134941.s001) [file journal.pone.0134941.s001]
