# Supplementary material for: Effects of Long Term Antibiotic Therapy on Human Oral and Fecal Viromes
Source: PLOS journal article supplement (doi:10.1371/journal.pone.0134941), 2015-08-26
Supplement: S5 (10.1371/journal.pone.0134941.s005) [file journal.pone.0134941.s005]

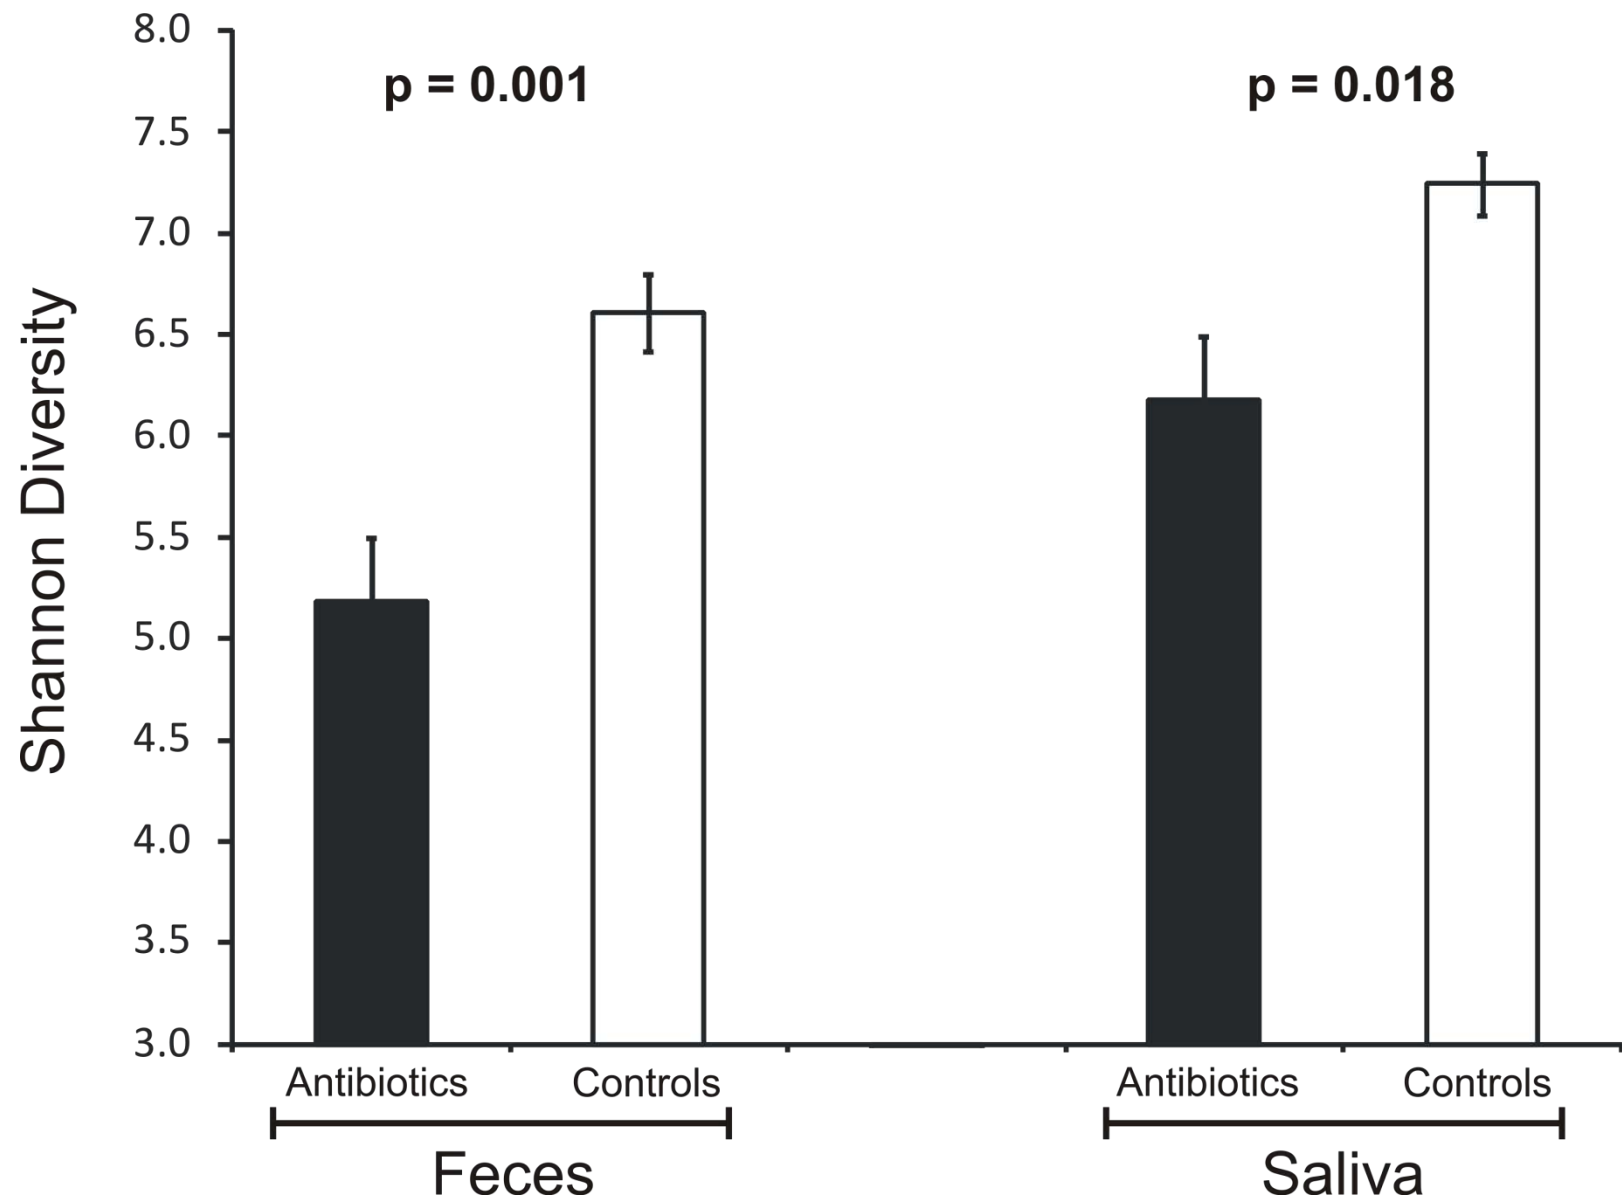

**S5 Fig:** Shannon diversity index values ( $\pm$ standard error) for fecal and salivary bacterial biota based on 16S rRNA. P-values are represented above each diagram, and values  $\leq 0.05$  are represented in bold.
